# Supplementary material for: Full transcription of the chloroplast genome in photosynthetic eukaryotes
Source: PubMed Central journal article supplement (PMC4960489; doi:10.1038/srep30135), 2016-07-26
Supplement: srep30135-s1.pdf [file srep30135-s1.pdf]

## Supplemental Information

### **Full transcription of the chloroplast genome in photosynthetic eukaryotes**

Chao Shi<sup>1,3\*</sup>, Shuo Wang<sup>2\*</sup>, En-Hua Xia<sup>1,3\*</sup>, Jian-Jun Jiang<sup>2</sup>, Fan-Chun Zeng<sup>2</sup>, and Li-Zhi Gao<sup>1,2\*\*</sup>

<sup>1</sup>Plant Germplasm and Genomics Center, Germplasm Bank of Wild Species in Southwest China, Kunming Institute of Botany, the Chinese Academy of Sciences, Kunming 650204, China

<sup>2</sup>Faculty of Life Science and Technology, Kunming University of Science and Technology, Kunming 650093, China

<sup>3</sup>University of the Chinese Academy of Sciences, Beijing 100039, China

\*These authors contribute equally to this work.

\*\*To whom correspondence should be addressed. Tel./Fax: +86-871-5223277, Email:

Lgao@mail.kib.ac.cn

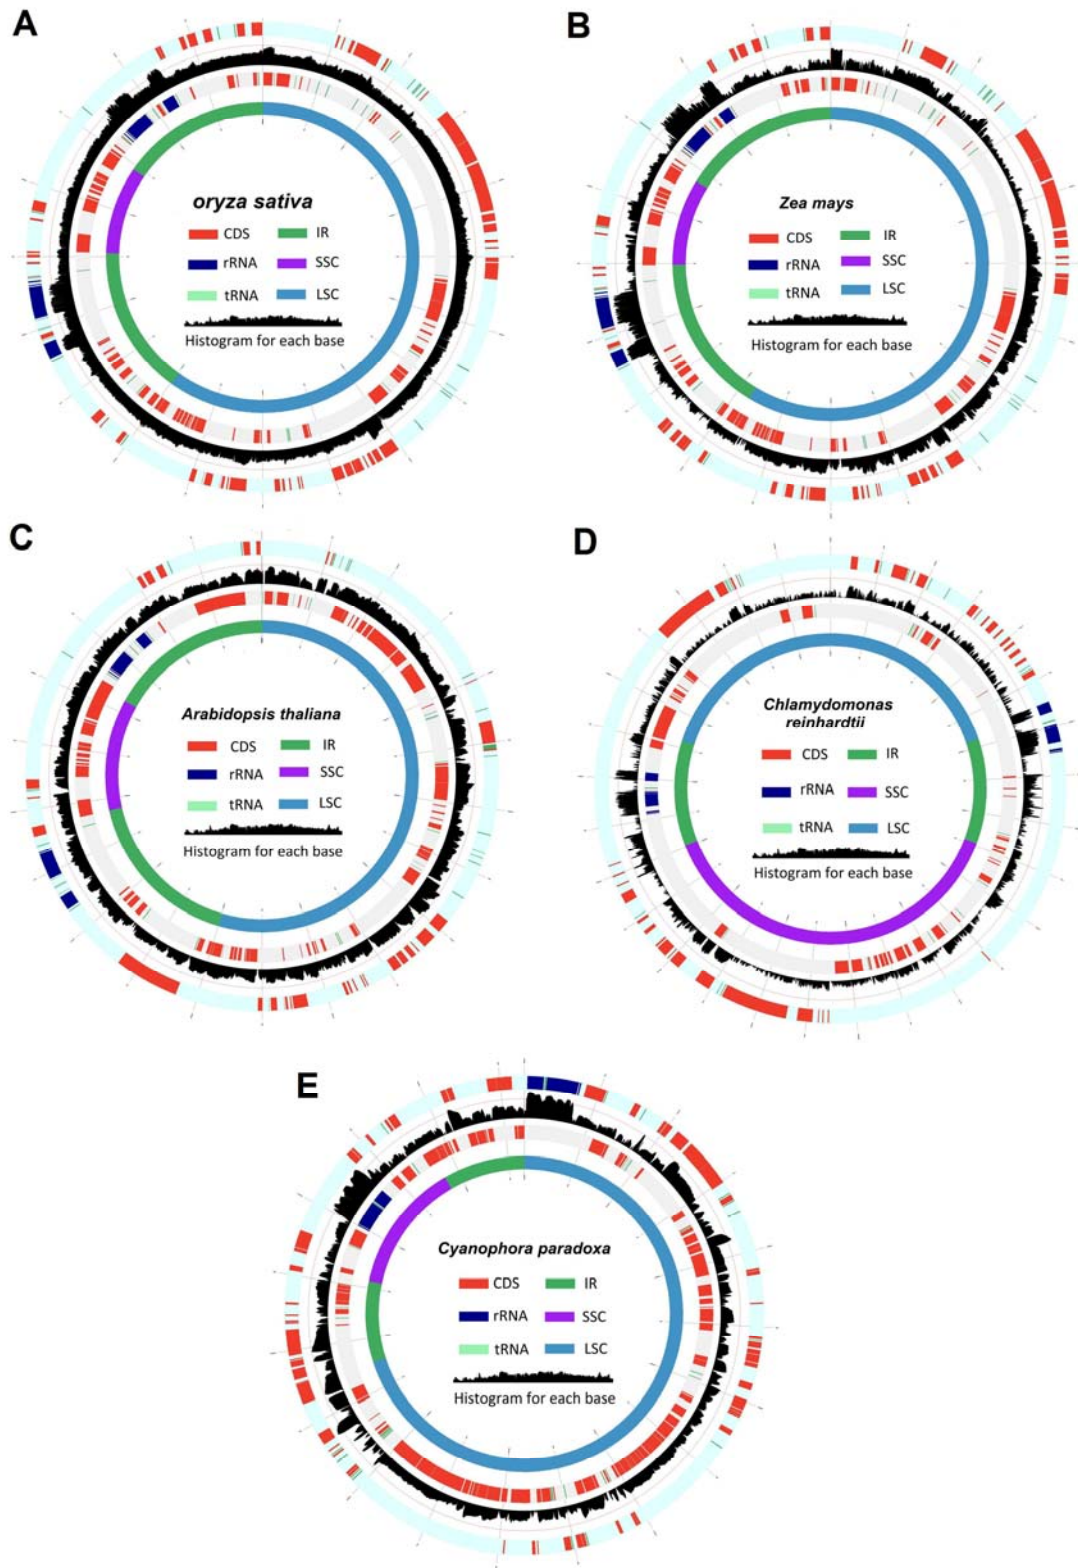

**Supplementary Figure 1. Full transcription of the photosynthetic eukaryote chloroplast genome.** This is an enlarged version of the map in **Figure 1A and B**. The outer and third tracks represent the plastome genes, the inner track shows the four

genomic regions of the plastome, and the black histogram of the second track represents RNAseq reads mapping (scale  $\log_{10}$ -transformed numbers of sequence reads per nucleotide).

**Supplementary Table 1. The representative transcription units of chloroplast genes in higher plants.**

---

| <b>Representative transcript units in higher plants*</b> |                                                                              |
|----------------------------------------------------------|------------------------------------------------------------------------------|
| 1                                                        | <i>atpB-atpE</i>                                                             |
| 2                                                        | 3' <i>rps12-rps7</i>                                                         |
| 3                                                        | <i>psbE-psbF-psbL-psbJ</i>                                                   |
| 4                                                        | <i>psbD-psbC-orf62</i> (in dicots)                                           |
| 5                                                        | <i>psbK-psbI-psbD-psbC-orf62-trnG</i> (in monocots)                          |
| 6                                                        | <i>ndhC-ndhK-ndhJ</i>                                                        |
| 7                                                        | 16S <i>rDNA-trnI-trnA</i> -23S <i>rDNA</i> -4.5S <i>rDNA</i> -5S <i>rDNA</i> |
| 8                                                        | <i>rpoB-rpoC1-rpoC2</i>                                                      |
| 9                                                        | <i>rpl23-rpl2-rps19-rpl22-rps3-rpl16-rpl14-rps8-infA-rpl36-rps11-rpoA</i>    |
| 10                                                       | <i>trnE-trnY-trnD</i>                                                        |
| 11                                                       | <i>clpP-rps12-rpl20</i>                                                      |
| 12                                                       | <i>orf31-petG-psaJ-rpl33-rps18</i>                                           |
| 13                                                       | <i>psaA-psaB-rps14</i>                                                       |
| 14                                                       | <i>psaC-ndhD</i>                                                             |
| 15                                                       | <i>psbB-psbH-petB-petD</i>                                                   |
| 16                                                       | <i>psbK-psbI-trnG</i>                                                        |
| 17                                                       | <i>ndhA-ndhI-ndhG-ndhE-psaC</i>                                              |
| 18                                                       | <i>rpl32-sprA</i>                                                            |
| 19                                                       | <i>rps2-atpI-atpH-atpF-atpA</i>                                              |

---

\*Only major transcription units were listed. Please also see ref (12, 13).

**Supplementary Table 2. Summary of sequence reads used in this study.**

| <b>Species</b>                             | <b>Tissues</b>                                     | <b>Sequence data</b> | <b>Reference</b> |
|--------------------------------------------|----------------------------------------------------|----------------------|------------------|
| <i>O. sativa</i>                           | seedling shoots                                    | ERA000212            | (43)             |
| <i>A. thaliana</i>                         | seedlings and flowers                              | SRA047499            | (44)             |
|                                            | immature floral tissue<br>(directional sequencing) | SRA000286            | (45)             |
| <i>Z. mays</i>                             | leaves                                             | SRA050928            | Not available    |
| <i>C. reinhardtii</i>                      | whole cell                                         | SRA026231            | Not available    |
| <i>C. paradoxa</i>                         | whole cell                                         | SRA047914            | (46)             |
| <i>Prochlorococcus marinus</i><br>CCMP1986 | whole cell                                         | SRA050651            | Not available    |
| <i>Synechococcus</i><br>PCC7002            | whole cell                                         | SRA044901            | Not available    |
| <i>Synechocystis</i><br>PCC6803            | whole cell                                         | SRA025999            | Not available    |

**Supplementary Table 3. Statistics of RNA-seq reads mapping with the chloroplast genomes.**

| Species                                     | Reads used for mapping | Average reads depth | Genome coverage (Bowtie) *         | Genome coverage (PASS) *           |
|---------------------------------------------|------------------------|---------------------|------------------------------------|------------------------------------|
| <i>A. thaliana</i>                          | 224,829,363            | 480                 | <b>98.76%</b>                      | <b>99.18%</b>                      |
| <i>A. thaliana</i> (F) <sup>b</sup>         |                        | 503                 | <b>93.33%</b>                      | <b>94.12%</b>                      |
| <i>A. thaliana</i> (R) <sup>b</sup>         | 133,741,703            | 534                 | <b>94.25%</b>                      | <b>94.88%</b>                      |
| <i>O. sativa</i>                            | 149,778,844            | 47,875              | <b>99.91%</b>                      | <b>99.92%</b>                      |
| <i>Z. mays</i>                              | 587,912,045            | 6,826               | <b>98.53%</b>                      | <b>99.56%</b>                      |
| <i>C. reinhardtii</i>                       | 575,401,566            | 988                 | <b>91.41% (99.34%)<sup>a</sup></b> | <b>90.73% (99.16%)<sup>a</sup></b> |
| <i>C. paradoxa</i>                          | 119,434,879            | 589                 | <b>98.23%</b>                      | <b>98.92%</b>                      |
| <i>Prochlorococcus marinus</i><br>CCMP 1986 | 59,735,881             | 43                  | <b>94.33%</b>                      | <b>94.34%</b>                      |
| <i>Synechococcus</i> PCC 7002               | 195,192,665            | 78                  | <b>99.27%</b>                      | <b>99.27%</b>                      |
| <i>Synechocystis</i> PCC 6803               | 459,631,042            | 758                 | <b>99.99%</b>                      | <b>99.98%</b>                      |

Note: \*All filtered reads were mapped using Bowtie or PASS.

<sup>a</sup> Genome coverage was calculated after trimming repeat sequences from the *C. reinhardtii* genome.

<sup>b</sup> Strand-specific sequencing data were mapped to forward (F) and reverse strand (R) of the chloroplast genome.

**Supplementary Table 4. Primers used to examine intergenic region transcription in the rice plastome.**

| <b>Primer</b> | <b>Primer sequence (5'-3')</b> | <b>Position</b> | <b>Region</b>   |
|---------------|--------------------------------|-----------------|-----------------|
| 1F            | GCCGAGTACTCTACCATTGA           | 3902            | <i>tRNA-Lys</i> |
| 1R            | CGTATTGTATTCTGCACGAGA          | 6567            | <i>tRNA-Gln</i> |
| 2F            | GTTTGGGAAAGTCCGAAGAA           | 6921            | <i>psbK</i>     |
| 2R            | ACCATTTCCGAGCACCTTAT           | 8855            | <i>psbD</i>     |
| 3F            | TTTCTGTTCTGGCTCGGT             | 11364           | <i>psbC</i>     |
| 3R            | CGTCTCCGCACTTAGCAGT            | 12832           | <i>tRNA-Met</i> |
| 4F            | CGGACGCCTTAAGTATATCA           | 13677           | <i>tRNA-Gly</i> |
| 4R            | TCGCCTGTCCTACTCTAAGA           | 16159           | <i>tRNA-Tyr</i> |
| 5F            | GGCAGGAAGCAAGATCAAATA          | 16362           | <i>tRNA-Asp</i> |
| 5R            | AACGTGGATGAATACTTGCTC          | 18158           | <i>tRNA-Cys</i> |
| 6F            | GCAAGTATTCATCCACGTTTC          | 18160           | <i>tRNA-Cys</i> |
| 6R            | CGTCAAGTATACCCGTTTCAA          | 20101           | <i>rpoB</i>     |
| 7F            | GTCATTGGGTTAAGAGAAGTTCCGATTG   | 24,319          | <i>rpoc1</i>    |
| 7R            | GATGATACTGTAATGGAATGGCGAACC    | 26,456          | <i>rpoc2</i>    |
| 8F            | GATTCGCGATTTCCCTAAGA           | 27700           | <i>rpoc2</i>    |
| 8R            | AATGACAACGAGCCCTTATT           | 29804           | <i>rps2</i>     |
| 9F            | TATAGCTCTTCGGGAATGT            | 30062           | <i>rps2</i>     |
| 9R            | TTGTCCTGCAGCAGTACCTTGACCAACT   | 32114           | <i>atpH</i>     |
| 10F           | TCCCAGCCCTGATACCAAT            | 43344           | <i>ycf3</i>     |
| 10R           | GGCCATCTCTCCTCCATAATC          | 44430           | <i>tRNA-Ser</i> |
| 11F           | GATTACTTCCGATTTAGGTG           | 45323           | <i>rps4</i>     |
| 11R           | ATCTACATTCCTTGCCGATA           | 47274           | <i>tRNA-Leu</i> |
| 12F           | CCAATAATTTGTCAGGCGACT          | 50878           | <i>tRNA-Val</i> |
| 12R           | AGTAGGGAACGGACTCGTGA           | 52689           | <i>atpB</i>     |
| 13F           | GGAGCTCCCGTGTCAATCACT          | 53022           | <i>atpB</i>     |
| 13R           | GAAGCCACCGGTATAACACCT          | 55211           | <i>rbcL</i>     |
| 14F           | CCGGTAGATAAACTAGATAGC          | 55,506          | <i>rbcL</i>     |
| 14R           | CGCCAACCTAGATACTCCT            | 57,598          | <i>psaI</i>     |
| 15F           | CCTTTACCGCGCATTATTG            | 56638           | <i>psaI</i>     |
| 15R           | GATTGGATATCCCGCATAAG           | 58063           | <i>ycf4</i>     |
| 16F           | GCGGGATATCCAATCAATTAG          | 58068           | <i>ycf4</i>     |
| 16R           | GGGAACAGGGCCTATCACAA           | 60044           | <i>petA</i>     |
| 17F           | GTGCTTCAGGATCCATTACGC          | 60436           | <i>petA</i>     |
| 17R           | GAACTATGACACAATCAAACCCGAATG    | 61910           | <i>psbL</i>     |
| 18F           | TGATCCTTTCTTTCTCCTCGCTTCAT     | 61226           | <i>psbJ</i>     |
| 18R           | AGTCCCTAATTCCGAATCAAG          | 63345           | <i>psbE</i>     |
| 19F           | CCTGTGACATTTTGTACCC            | 64250           | <i>tRNA-Trp</i> |
| 19R           | ACGAGCCTGTTTTATAGCA            | 65914           | <i>rps18</i>    |

---

|     |                                |        |                 |
|-----|--------------------------------|--------|-----------------|
| 20F | TTCTTCTTCCTCTTCGGTTTC          | 65110  | <i>rpl33</i>    |
| 20R | TGCCGTCACGTGTATGGATAA          | 67070  | <i>rpl20</i>    |
| 21F | CGCCATTCTGAGATTAAC             | 68053  | <i>ClpP</i>     |
| 21R | CACACACTCATATTCCAGAGATACCGAAAC | 71214  | <i>psbH</i>     |
| 22F | GTTTCGGTCGGTCTTATTGTA          | 77899  | <i>rpl14</i>    |
| 22R | TGAGAAATTGACTCGGAAAG           | 78704  | <i>rpl16</i>    |
| 23F | GGCCTGTTATCTCTATCAAGA          | 71283  | <i>psbH</i>     |
| 24R | CCCCTCAATATTGCAAGTTT           | 73298  | <i>petD</i>     |
| 25F | GACCTTGCGGATCTGTAACA           | 75671  | <i>rps11</i>    |
| 26R | TGAGAAATTGACTCGGAAAG           | 78704  | <i>rpl16</i>    |
| 27F | AGGTTTGAATCTCGCAATGG           | 78668  | <i>rpl16</i>    |
| 28R | AGAAGAAGAGTGGGCTAAGGA          | 80506  | <i>rpl22</i>    |
| 29F | ATAGTACTCCTACTGACTTCGGCTTTAGTG | 80223  | <i>rps3</i>     |
| 29R | GTAACGGCAGCAAGTGATTGA          | 82128  | <i>rpl2</i>     |
| 30F | TCTTCTCTCCATCGGAACAA           | 87396  | <i>ndhB</i>     |
| 30R | TTATTCGAGGAGCCCTAGAT           | 89080  | <i>rps12</i>    |
| 31F | GGGCGTGGAAACAGATAGAA           | 90548  | <i>orf71</i>    |
| 31R | GTTTACGGCTAGGACTACTGG          | 92044  | <i>rrn16</i>    |
| 32F | ATGCAAAGCGAAGAACCTTAC          | 92212  | <i>rrn16</i>    |
| 32R | GGTCTGTGAAGATGCGTTGTT          | 93491  | <i>ycf68</i>    |
| 33F | GGGTGAGTCAGGGCCTAAGAT          | 96581  | <i>rrn23</i>    |
| 34R | ATAGAGTCCGACCGCAACGAC          | 99684  | <i>tRNA-Asn</i> |
| 35F | ATGAGTCTACCGCTTACAAGA          | 101230 | <i>rps15</i>    |
| 35R | GTCTATCCTCATGAACCGGGAAATACTATG | 102016 | <i>ndhF</i>     |
| 36F | GACACCCTTGTCGAAAACTGCGTTAGT    | 101578 | <i>rps15</i>    |
| 36R | GGGGTTGGTTACTAGTTCC            | 103213 | <i>ndhF</i>     |
| 37F | AGCCCATATGCGACGAAGAT           | 103516 | <i>ndhF</i>     |
| 37R | TGGGTAATGTAAATGAACCAT          | 106177 | <i>ccsA</i>     |
| 38F | GCTCGTACACATTGAGTGCAT          | 108208 | <i>psac</i>     |
| 38R | CGGGTGAATTTGTCTATT             | 110875 | <i>ndhI</i>     |
| 39F | TGCCACAGCTACAAAGTAGGA          | 109576 | <i>ndhE</i>     |
| 39R | ATTGGTCTTCTTATGGCAGGATATAGCTCA | 112255 | <i>ndhA</i>     |
| 40F | GAGCTATATCCTGCCATAAGA          | 112256 | <i>ndhA</i>     |
| 40R | GCGGTAATTTTCATCGTTC            | 114018 | <i>rps15</i>    |

---



**Supplementary Table 5. Tissue-specific transcriptome reads mapping in the rice plastome.**

**A. Transcriptome reads from seven different tissues.**

| <b>Tissues</b> | <b>Normalized reads*</b> | <b>Mapped reads</b> | <b>Coverage (%)</b> |
|----------------|--------------------------|---------------------|---------------------|
| <b>Root</b>    | 38,903,554               | 7,780 (0.02%)       | 32.1                |
| <b>Callus</b>  | 38,903,554               | 23,342 (0.06%)      | 35.1                |
| <b>Seed</b>    | 38,903,554               | 151,723 (0.39%)     | 73.1                |
| <b>PAAF</b>    | 38,903,554               | 482,404 (1.24%)     | 77.1                |
| <b>PABF</b>    | 38,903,554               | 567,991 (1.46%)     | 76.8                |
| <b>Leaf</b>    | 38,903,554               | 887,001 (2.28%)     | 73.6                |
| <b>Shoot</b>   | 38,903,554               | 1,015,383 (2.61%)   | 78.4                |

**B. Transcriptome reads from four different tissues and with higher in-depth sequencing.**

| <b>Tissues</b> | <b>Normalized reads*</b> | <b>Mapped reads</b> | <b>Coverage (%)</b> |
|----------------|--------------------------|---------------------|---------------------|
| <b>Root</b>    | 52,627,968               | 63,154 (0.12%)      | 72.6                |
| <b>PABF</b>    | 52,627,968               | 931,515 (1.77%)     | 89.4                |
| <b>Leaf</b>    | 52,627,968               | 1,405,166 (2.67%)   | 99.3                |
| <b>Shoot</b>   | 52,627,968               | 1,505,159 (2.86%)   | 99.7                |

\*All reads were normalized to contain same number of reads by randomly extraction from different tissues.

**Supplementary Table 7. *De novo* chloroplast genome assembly from transcriptome data.**

| <b>Taxa</b> | <b>Species</b>                    | <b>Data</b> | <b>Plastome assemble length</b> |
|-------------|-----------------------------------|-------------|---------------------------------|
| Bryophytes  | <i>Pohlia nutans</i>              | SRP012293   | 122,067                         |
|             | <i>Ceratodon purpureus</i>        | SRX032867   | 120,749                         |
| angiosperms | <i>Dioscorea villosa</i>          | SRX060329   | 152,589                         |
|             | <i>Chlorophytum rhizopendulum</i> | SRX116253   | 148,744                         |
|             | <i>Echinacea purpurea</i>         | SRX085116   | 151,084                         |
|             | <i>Lactuca serriola</i>           | SRX098217   | 162,202                         |
|             | <i>Valeriana officinalis</i>      | SRX047631   | 152,768                         |
|             | <i>Scabiosa columbaria</i>        | SRX090087   | 162,104                         |
|             | <i>Beta vulgaris</i>              | ERX026027   | 150,673                         |
|             | <i>Cajanus cajan</i>              | SRA030523   | 120,869                         |
|             | <i>Corylus avellana</i>           | SRX154512   | 156,977                         |
|             | <i>Hypericum perforatum</i>       | SRX062064   | 156,712                         |
|             | <i>Pomegranate peel</i>           | SRX034876   | 159,871                         |
|             | <i>Musa cavendish</i>             | SRX146849   | 169,992                         |

**Supplementary Table 8. Tissue-specific small RNA-seq reads mapping in rice plastome.**

| <b>Tissues</b> | <b>Normalized reads*</b> | <b>Mapped reads</b> | <b>Coverage (%)</b> |
|----------------|--------------------------|---------------------|---------------------|
| <b>Root</b>    | 15,004,156               | 1,757 (0.01%)       | 6.3                 |
| <b>PABF</b>    | 15,004,156               | 11,436 (0.07%)      | 25.0                |
| <b>Leaf</b>    | 15,004,156               | 420,375 (2.80%)     | 91.5                |
| <b>Shoot</b>   | 15,004,156               | 574,317 (3.82%)     | 94.2                |

\*All reads were normalized to contain same number of reads by randomly extraction from different tissues.

## REFERENCES

43. T. Lu *et al.*, Function annotation of the rice transcriptome at single-nucleotide resolution by RNA-seq. *Genome Research* **20**, 1238-1249 (2010).
44. Y. Marquez, J. W. Brown, C. Simpson, A. Barta, M. Kalyna, Transcriptome survey reveals increased complexity of the alternative splicing landscape in *Arabidopsis*. *Genome Research* **22**, 1184-1195 (2012).
45. R. Lister *et al.*, Highly integrated single-base resolution maps of the epigenome in *Arabidopsis*. *Cell* **133**, 523-536 (2008).
46. D. C. Price *et al.*, *Cyanophora paradoxa* genome elucidates origin of photosynthesis in algae and plants. *Science* **335**, 843-847 (2012).
